# Supplementary material
Source: PubMed Central journal article supplement (PMC7770569)
Supplement: bloodBLD2020005397-suppl1.pdf [file bloodBLD2020005397-suppl1.pdf]

## Table of Contents

|                                                                                                                                                                              |    |
|------------------------------------------------------------------------------------------------------------------------------------------------------------------------------|----|
| Supplemental Table 1 – List of variables offered to multivariable models .....                                                                                               | 2  |
| Supplemental Table 2 – HCT-CI unadjusted multivariable models for overall survival, non-relapse mortality, and relapse.....                                                  | 3  |
| Supplemental Table 3 – Multivariable models with HCT-CI.....                                                                                                                 | 4  |
| Supplemental Table 4 – Association between somatic mutations and shortest and longest telomere length quartiles.....                                                         | 5  |
| Supplemental Table 5 – Distribution of conditioning regimens by telomere length quartiles.....                                                                               | 7  |
| Supplemental Table 6 – Reported causes of death according to telomere length groups and conditioning intensity .....                                                         | 8  |
| Supplemental Table 7 – Association between Hematopoietic Cell Transplantation Comorbidity Index (HCT-CI) components and telomere length groups .....                         | 9  |
| Supplemental Table 8 – Patient characteristics by telomere length quartiles in patients with HCT-CI score 0 who received myeloablative conditioning .....                    | 11 |
| Supplemental Table 9 – GvHD prophylaxis by telomere quartiles and conditioning intensity .....                                                                               | 14 |
| Supplemental Table 10 – Patient characteristics according to telomere length quartiles among patients who received myeloablative conditioning regimen .....                  | 15 |
| Supplemental Table 11 – Patient characteristics according to telomere length quartiles among patients who received reduced-intensity conditioning regimen .....              | 18 |
| Supplemental Figure 1 – Outcomes by telomere length quartiles in patients under age 40.....                                                                                  | 21 |
| Supplemental Figure 2 – Characteristics of patients with somatic mutations in <i>SRSF2</i> , <i>DNMT3A</i> , <i>STAG2</i> , <i>ATM</i> , <i>WT1</i> , and <i>PPM1D</i> ..... | 22 |
| Supplemental Figure 3 - Association between recipient neutrophil count and recipient telomere length .                                                                       | 23 |
| Supplemental Figure 4 –Outcomes in myeloablative and reduced intensity conditioning, pairwise telomere quartile comparisons .....                                            | 24 |
| Supplemental Figure 5 – HCT-CI score and year of transplantation .....                                                                                                       | 25 |
| Supplemental Figure 6 – Outcomes after chronic GVHD by telomere length .....                                                                                                 | 26 |
| Supplemental Figure 7 – Distribution of melphalan doses in Flu/Mel RIC.....                                                                                                  | 27 |
| Supplemental Figure 8 – Outcomes by telomere length quartiles in RIC groups .....                                                                                            | 28 |
| References: .....                                                                                                                                                            | 29 |

Supplemental Table 1 – List of variables offered to multivariable models

| <b>Patient-related variables</b>                      | <b>Categories</b>                                                                                                                   |
|-------------------------------------------------------|-------------------------------------------------------------------------------------------------------------------------------------|
| Recipient age                                         | 10-year increase                                                                                                                    |
| Recipient age decade                                  | 40-49, 50-59, 60+                                                                                                                   |
| Recipient sex                                         | Male, Female                                                                                                                        |
| Karnofsky performance-status score                    | 10-80, 90-100                                                                                                                       |
| Hematopoietic Cell Transplantation Comorbidity Index  | 0, 1-2, 3                                                                                                                           |
| Recipient telomere length quartiles                   | Shortest, Intermediate (2 <sup>nd</sup> and 3 <sup>rd</sup> ), Longest                                                              |
| Predisposing condition                                | No, Yes                                                                                                                             |
| <b>Disease-related variables</b>                      | <b>Categories</b>                                                                                                                   |
| Hemoglobin (g/dL)                                     | < 0.8, 8-10, >= 10                                                                                                                  |
| Platelet count (x 109/L)                              | < 50, 50-100, >= 100                                                                                                                |
| Absolute neutrophil count (x 109/L)                   | < 0.8, >= 0.8                                                                                                                       |
| Bone marrow blasts at diagnosis (%)                   | <2, 2-5, 6-10, >10                                                                                                                  |
| Bone marrow blasts at transplantation (%)             | <2, 2-5, 6-10, >10                                                                                                                  |
| <i>TP53</i>                                           | No mutation, Mutation                                                                                                               |
| <i>JAK2</i> V617F                                     | No mutation, Mutation                                                                                                               |
| RAS-tyrosine kinase pathway                           | No mutation, Mutation                                                                                                               |
| IPSS-R Risk score prior to transplantation            | Very low, Low, Intermediate, High, Very high                                                                                        |
| IPSS-R Risk score prior to transplantation, Very high | Very high, Others                                                                                                                   |
| IPSS-R Cytogenetic Risk group, Very poor              | Very poor, Others                                                                                                                   |
| Monosomal Karyotype                                   | No, Yes, Unknown                                                                                                                    |
| Prior MDS therapy                                     | None, Hypomethylating agent (HMA), Chemotherapy +/- HMA                                                                             |
| MDS type                                              | De novo MDS, Therapy-related MDS                                                                                                    |
| Shaffer score <sup>1</sup>                            | Low (0-1) < Int (2-3) < High (4-5) < Very High (6+)                                                                                 |
| <b>Transplant-related variables</b>                   | <b>Categories</b>                                                                                                                   |
| Conditioning intensity                                | Myeloablative, Reduced intensity, Nonmyeloablative                                                                                  |
| Conditioning intensity                                | Myeloablative, Reduced intensity                                                                                                    |
| Conditioning intensity                                | Myeloablative, Reduced intensity Fludarabine/Melphalan -based, Reduced intensity non-Fludarabine/Melphalan -based, Nonmyeloablative |
| Donor group                                           | Matched Related, Matched Unrelated, Mismatched, Cord Blood                                                                          |
| Donor age                                             | < 35, >= 35, Missing                                                                                                                |
| Donor sex                                             | Male, Female                                                                                                                        |
| Donor sex match                                       | Unmatched, Matched                                                                                                                  |
| Donor type                                            | Bone marrow, PBSC, Cord blood, Other                                                                                                |
| In vivo T-cell depletion                              | No, Yes                                                                                                                             |
| GVHD prophylaxis                                      | None reported, ex vivo T-cell depletion, CD34 selection, Cyclophosphamide-based, Tacrolimus-based, CSA-based, Other                 |
| Year of transplantation                               | 2005-2007, 2008-2014                                                                                                                |

Supplemental Table 2 – HCT-CI unadjusted multivariable models for overall survival, non-relapse mortality, and relapse

|                                                     | Cox: Overall Survival |              |                   |         | CRR: NRM     |                   |         | CRR: Relapse |                   |         |
|-----------------------------------------------------|-----------------------|--------------|-------------------|---------|--------------|-------------------|---------|--------------|-------------------|---------|
|                                                     | Total                 | Events       |                   | P       | Events       |                   | P       | Events       |                   | P       |
|                                                     | n = 1267 (%)          | n = 835 (66) | HR (95% CI)       |         | n = 459 (36) | HR (95% CI)       |         | n = 472 (37) | HR (95% CI)       |         |
| <b>TP53</b>                                         |                       |              |                   |         |              |                   |         |              |                   |         |
| No mutation                                         | 1005 (79)             | 622 (74)     | Reference         |         | 365 (80)     | Reference         |         | 339 (72)     | Reference         |         |
| Mutation                                            | 262 (21)              | 213 (26)     | 1.72 (1.46, 2.02) | < 0.001 | 94 (20)      | 0.98 (0.77, 1.25) | 0.89    | 133 (28)     | 1.75 (1.42, 2.17) | < 0.001 |
| <b>IPSSR</b>                                        |                       |              |                   |         |              |                   |         |              |                   |         |
| Other                                               | 1133 (89)             | 723 (87)     | Reference         |         | 404 (88)     | Reference         |         | 407 (86)     | Reference         |         |
| Very high                                           | 134 (11)              | 112 (13)     | 1.69 (1.37, 2.07) | < 0.001 | 55 (12)      | 1.15 (0.85, 1.57) | 0.37    | 65 (14)      | 1.42 (1.06, 1.91) | 0.02    |
| <b>Recipient telomere length quartile</b>           |                       |              |                   |         |              |                   |         |              |                   |         |
| Longest                                             | 317 (25)              | 174 (21)     | Reference         |         | 91 (20)      | Reference         |         | 111 (24)     | Reference         |         |
| Intermediate (2 <sup>nd</sup> and 3 <sup>rd</sup> ) | 633 (50)              | 433 (52)     | 1.35 (1.13, 1.62) | < 0.001 | 233 (51)     | 1.31 (1.03, 1.68) | 0.03    | 244 (52)     | 1.09 (0.87, 1.36) | 0.47    |
| Shortest                                            | 317 (25)              | 228 (27)     | 1.52 (1.24, 1.85) | < 0.001 | 135 (29)     | 1.57 (1.20, 2.06) | 0.001   | 117 (25)     | 1.02 (0.78, 1.32) | 0.9     |
| <b>Donor group</b>                                  |                       |              |                   |         |              |                   |         |              |                   |         |
| Matched, related                                    | 165 (13)              | 100 (12)     | Reference         |         | 37 (8)       | Reference         |         | 74 (16)      | Reference         |         |
| Matched, unrelated                                  | 755 (60)              | 480 (57)     | 1.09 (0.86, 1.39) | 0.46    | 268 (58)     | 1.57 (1.08, 2.27) | 0.02    | 277 (59)     | 0.82 (0.62, 1.10) | 0.19    |
| Mismatched                                          | 242 (19)              | 181 (22)     | 1.55 (1.19, 2.01) | 0.001   | 111 (24)     | 2.26 (1.53, 3.36) | < 0.001 | 82 (17)      | 0.73 (0.52, 1.03) | 0.07    |
| Cord Blood                                          | 105 (8)               | 74 (9)       | 1.76 (1.26, 2.48) | 0.001   | 43 (9)       | 2.13 (1.28, 3.53) | 0.004   | 39 (8)       | 0.92 (0.59, 1.43) | 0.70    |
| <b>RAS-tyrosine kinase pathway</b>                  |                       |              |                   |         |              |                   |         |              |                   |         |
| No mutation                                         | 1118 (88)             | 724 (87)     | Reference         |         | 404 (88)     | Reference         |         | 409 (87)     | Reference         |         |
| Mutation                                            | 149 (12)              | 111 (13)     | 1.35 (1.10, 1.65) | 0.004   | 55 (12)      | 1.02 (0.75, 1.38) | 0.91    | 63 (13)      | 1.25 (0.94, 1.67) | 0.13    |
| <b>Donor age</b>                                    |                       |              |                   |         |              |                   |         |              |                   |         |
| < 35 years old                                      | 755 (60)              | 487 (58)     | Reference         |         | 279 (61)     | Reference         |         | 270 (57)     | Reference         |         |
| 35 years or older                                   | 503 (40)              | 343 (41)     | 1.25 (1.07, 1.45) | 0.005   | 178 (39)     | 1.11 (0.90, 1.36) | 0.32    | 198 (42)     | 1.07 (0.87, 1.32) | 0.50    |
| Missing                                             | 9 (1)                 | 5 (1)        | 0.73 (0.30, 1.79) | 0.50    | 2 (0)        | 0.52 (0.13, 2.08) | 0.35    | 4 (1)        | 1.31 (0.55, 3.12) | 0.54    |
| <b>Age</b>                                          |                       |              |                   |         |              |                   |         |              |                   |         |
| 10 year increase                                    | 1267 (100)            | 835 (100)    | 1.15 (1.04, 1.27) | 0.005   | 459 (100)    | 1.10 (0.96, 1.26) | 0.18    | 472 (100)    | 1.09 (0.96, 1.24) | 0.17    |
| <b>Year of transplantation</b>                      |                       |              |                   |         |              |                   |         |              |                   |         |
| 2005-2007                                           | 219 (17)              | 163 (20)     | Reference         |         | 97 (21)      | Reference         |         | 80 (17)      | Reference         |         |
| 2008-2014                                           | 1048 (83)             | 672 (80)     | 0.78 (0.65, 0.93) | 0.007   | 362 (79)     | 0.79 (0.62, 1.00) | 0.06    | 392 (83)     | 0.97 (0.75, 1.26) | 0.82    |
| <b>Karnofsky Performance Score</b>                  |                       |              |                   |         |              |                   |         |              |                   |         |
| 90-100                                              | 640 (51)              | 410 (49)     | Reference         |         | 227 (49)     | Reference         |         | 232 (49)     | Reference         |         |
| 10-80                                               | 382 (30)              | 272 (33)     | 1.23 (1.06, 1.44) | 0.008   | 160 (35)     | 1.21 (0.99, 1.49) | 0.07    | 134 (28)     | 0.95 (0.76, 1.19) | 0.67    |
| Missing                                             | 245 (19)              | 153 (18)     | 1.03 (0.85, 1.24) | 0.80    | 72 (16)      | 0.86 (0.66, 1.14) | 0.30    | 106 (22)     | 1.24 (0.98, 1.57) | 0.08    |
| <b>JAK2 V617F</b>                                   |                       |              |                   |         |              |                   |         |              |                   |         |
| No mutation                                         | 1232 (97)             | 806 (97)     | Reference         |         | 439 (96)     | Reference         |         | 461 (98)     | Reference         |         |
| Mutation                                            | 35 (3)                | 29 (3)       | 1.58 (1.09, 2.30) | 0.02    | 20 (4)       | 1.81 (1.11, 2.94) | 0.02    | 11 (2)       | 0.89 (0.49, 1.62) | 0.71    |

Supplemental Table 3 – Multivariable models with HCT-CI  
HCT-CI was forced into the multivariable models shown in supplemental Table 2.

|                                                        | Total<br>n = 1267<br>(%) | Cox: Overall Survival     |                   |         | CRR: NRM                  |                   |       | CRR: Relapse           |                   |         |
|--------------------------------------------------------|--------------------------|---------------------------|-------------------|---------|---------------------------|-------------------|-------|------------------------|-------------------|---------|
|                                                        |                          | Events<br>n = 835<br>(66) | HR (95% CI)       | P       | Events<br>n = 459<br>(36) | HR (95% CI)       | P     | Events<br>n = 472 (37) | HR (95% CI)       | P       |
| <b>TP53</b>                                            |                          |                           |                   |         |                           |                   |       |                        |                   |         |
| No mutation                                            | 1005 (79)                | 622 (74)                  | Reference         |         | 365 (80)                  | Reference         |       | 339 (72)               | Reference         |         |
| Mutation                                               | 262 (21)                 | 213 (26)                  | 1.69 (1.43, 2.00) | < 0.001 | 94 (20)                   | 0.97 (0.76, 1.25) | 0.84  | 133 (28)               | 1.76 (1.42, 2.19) | < 0.001 |
| <b>IPSSR</b>                                           |                          |                           |                   |         |                           |                   |       |                        |                   |         |
| Other                                                  | 1133 (89)                | 723 (87)                  | Reference         |         | 404 (88)                  | Reference         |       | 407 (86)               | Reference         |         |
| Very high                                              | 134 (11)                 | 112 (13)                  | 1.66 (1.35, 2.05) | < 0.001 | 55 (12)                   | 1.14 (0.84, 1.56) | 0.40  | 65 (14)                | 1.44 (1.07, 1.94) | 0.02    |
| <b>Recipient telomere length quartile</b>              |                          |                           |                   |         |                           |                   |       |                        |                   |         |
| Longest                                                | 317 (25)                 | 174 (21)                  | Reference         |         | 91 (20)                   | Reference         |       | 111 (24)               | Reference         |         |
| Intermediate (2 <sup>nd</sup><br>and 3 <sup>rd</sup> ) | 633 (50)                 | 433 (52)                  | 1.34 (1.12, 1.60) | 0.001   | 233 (51)                  | 1.30 (1.02, 1.67) | 0.04  | 244 (52)               | 1.09 (0.87, 1.37) | 0.46    |
| Shortest                                               | 317 (25)                 | 228 (27)                  | 1.49 (1.22, 1.83) | < 0.001 | 135 (29)                  | 1.56 (1.19, 2.04) | 0.001 | 117 (25)               | 1.02 (0.78, 1.33) | 0.88    |
| <b>Donor group</b>                                     |                          |                           |                   |         |                           |                   |       |                        |                   |         |
| Matched, related                                       | 165 (13)                 | 100 (12)                  | Reference         |         | 37 (8)                    | Reference         |       | 74 (16)                | Reference         |         |
| Matched, unrelated                                     | 755 (60)                 | 480 (57)                  | 1.00 (0.66, 1.52) | 0.99    | 268 (58)                  | 1.08 (0.58, 2.01) | 0.81  | 277 (59)               | 1.25 (0.74, 2.13) | 0.40    |
| Mismatched                                             | 242 (19)                 | 181 (22)                  | 1.41 (0.91, 2.18) | 0.12    | 111 (24)                  | 1.55 (0.82, 2.95) | 0.18  | 82 (17)                | 1.12 (0.64, 1.94) | 0.69    |
| Cord Blood                                             | 105 (8)                  | 74 (9)                    | 1.63 (1.01, 2.64) | 0.05    | 43 (9)                    | 1.47 (0.72, 3.00) | 0.29  | 39 (8)                 | 1.38 (0.74, 2.58) | 0.31    |
| <b>RAS-tyrosine kinase pathway</b>                     |                          |                           |                   |         |                           |                   |       |                        |                   |         |
| No mutation                                            | 1118 (88)                | 724 (87)                  | Reference         |         | 404 (88)                  | Reference         |       | 409 (87)               | Reference         |         |
| Mutation                                               | 149 (12)                 | 111 (13)                  | 1.35 (1.10, 1.66) | 0.004   | 55 (12)                   | 1.02 (0.76, 1.38) | 0.89  | 63 (13)                | 1.25 (0.93, 1.67) | 0.14    |
| <b>Donor age</b>                                       |                          |                           |                   |         |                           |                   |       |                        |                   |         |
| < 35 years old                                         | 755 (60)                 | 487 (58)                  | Reference         |         | 279 (61)                  | Reference         |       | 270 (57)               | Reference         |         |
| 35 years or older                                      | 503 (40)                 | 343 (41)                  | 1.26 (1.08, 1.47) | 0.004   | 178 (39)                  | 1.13 (0.92, 1.39) | 0.23  | 198 (42)               | 1.04 (0.84, 1.29) | 0.73    |
| Missing                                                | 9 (1)                    | 5 (1)                     | 0.75 (0.31, 1.82) | 0.52    | 2 (0)                     | 0.51 (0.12, 2.08) | 0.35  | 4 (1)                  | 1.36 (0.58, 3.16) | 0.48    |
| <b>Age</b>                                             |                          |                           |                   |         |                           |                   |       |                        |                   |         |
| 10 year increase                                       | 1267 (100)               | 835 (100)                 | 1.14 (1.03, 1.26) | 0.01    | 459 (100)                 | 1.08 (0.94, 1.24) | 0.27  | 472 (100)              | 1.11 (0.98, 1.27) | 0.11    |
| <b>Year of transplantation</b>                         |                          |                           |                   |         |                           |                   |       |                        |                   |         |
| 2005-2007                                              | 219 (17)                 | 163 (20)                  | Reference         |         | 97 (21)                   | Reference         |       | 80 (17)                | Reference         |         |
| 2008-2014                                              | 1048 (83)                | 672 (80)                  | 0.70 (0.44, 1.11) | 0.13    | 362 (79)                  | 0.49 (0.25, 0.96) | 0.04  | 392 (83)               | 1.64 (0.90, 2.97) | 0.11    |
| <b>Karnofsky Performance Score</b>                     |                          |                           |                   |         |                           |                   |       |                        |                   |         |
| 90-100                                                 | 640 (51)                 | 410 (49)                  | Reference         |         | 227 (49)                  | Reference         |       | 232 (49)               | Reference         |         |
| 10-80                                                  | 382 (30)                 | 272 (33)                  | 1.20 (1.03, 1.41) | 0.02    | 160 (35)                  | 1.18 (0.96, 1.45) | 0.12  | 134 (28)               | 0.96 (0.77, 1.20) | 0.75    |
| Missing                                                | 245 (19)                 | 153 (18)                  | 1.01 (0.83, 1.23) | 0.91    | 72 (16)                   | 0.87 (0.66, 1.15) | 0.34  | 106 (22)               | 1.20 (0.94, 1.53) | 0.14    |
| <b>JAK2 V617F</b>                                      |                          |                           |                   |         |                           |                   |       |                        |                   |         |
| No mutation                                            | 1232 (97)                | 806 (97)                  | Reference         |         | 439 (96)                  | Reference         |       | 461 (98)               | Reference         |         |
| Mutation                                               | 35 (3)                   | 29 (3)                    | 1.61 (1.11, 2.35) | 0.01    | 20 (4)                    | 1.84 (1.13, 3.01) | 0.02  | 11 (2)                 | 0.87 (0.48, 1.59) | 0.65    |
| <b>HCT-CI</b>                                          |                          |                           |                   |         |                           |                   |       |                        |                   |         |
| 0                                                      | 185 (15)                 | 102 (12)                  | Reference         |         | 60 (13)                   | Reference         |       | 65 (14)                | Reference         |         |
| 1-2                                                    | 228 (18)                 | 143 (17)                  | 1.23 (0.95, 1.59) | 0.11    | 82 (18)                   | 1.13 (0.80, 1.58) | 0.49  | 83 (18)                | 1.11 (0.80, 1.53) | 0.55    |
| 3 or above                                             | 497 (39)                 | 343 (41)                  | 1.29 (1.03, 1.62) | 0.03    | 193 (42)                  | 1.22 (0.90, 1.65) | 0.21  | 176 (37)               | 0.94 (0.70, 1.25) | 0.66    |
| Missing                                                | 357 (28)                 | 247 (30)                  | 1.09 (0.69, 1.73) | 0.72    | 124 (27)                  | 0.70 (0.36, 1.38) | 0.30  | 148 (31)               | 1.70 (0.95, 3.03) | 0.07    |

## Supplemental Table 4 – Association between somatic mutations and shortest and longest telomere length quartiles

Shown is the number of patients with a mutation in each telomere group, odds ratio of patient with a mutation belonging to the longest vs the shortest telomere length quartile, and nominal P value using Fisher's exact test. Results shown for patients age 40 or older and genes mutated in 10 or more patients.

| Gene          | Total<br>n = 1267 (%) | Telomere length quartile |                                                                     |                         | Odds Ratio<br>Longest vs Shortest | Nominal<br>P value |
|---------------|-----------------------|--------------------------|---------------------------------------------------------------------|-------------------------|-----------------------------------|--------------------|
|               |                       | Shortest<br>n = 317 (25) | Intermediate (2 <sup>nd</sup> and 3 <sup>rd</sup> )<br>n = 633 (50) | Longest<br>n = 317 (25) |                                   |                    |
| <i>SRSF2</i>  | 95 (7)                | 8 (3)                    | 37 (6)                                                              | 50 (16)                 | 7.21                              | < 0.001            |
| <i>DNMT3A</i> | 220 (17)              | 41 (13)                  | 101 (16)                                                            | 78 (25)                 | 2.19                              | < 0.001            |
| <i>PPM1D</i>  | 87 (7)                | 33 (10)                  | 40 (6)                                                              | 14 (4)                  | 0.4                               | 0.01               |
| <i>WT1</i>    | 21 (2)                | 12 (4)                   | 6 (1)                                                               | 3 (1)                   | 0.24                              | 0.03               |
| <i>STAG2</i>  | 84 (7)                | 17 (5)                   | 35 (6)                                                              | 32 (10)                 | 1.98                              | 0.04               |
| <i>ATM</i>    | 16 (1)                | 8 (3)                    | 7 (1)                                                               | 1 (0)                   | 0.12                              | 0.04               |
| <i>NPM1</i>   | 22 (2)                | 11 (3)                   | 8 (1)                                                               | 3 (1)                   | 0.27                              | 0.05               |
| <i>U2AF1</i>  | 117 (9)               | 40 (13)                  | 52 (8)                                                              | 25 (8)                  | 0.59                              | 0.07               |
| <i>TP53</i>   | 262 (21)              | 69 (22)                  | 142 (22)                                                            | 51 (16)                 | 0.69                              | 0.08               |
| <i>DDX41</i>  | 22 (2)                | 8 (3)                    | 12 (2)                                                              | 2 (1)                   | 0.25                              | 0.11               |
| <i>CBL</i>    | 32 (3)                | 13 (4)                   | 13 (2)                                                              | 6 (2)                   | 0.45                              | 0.16               |
| <i>SF3B1</i>  | 141 (11)              | 39 (12)                  | 74 (12)                                                             | 28 (9)                  | 0.69                              | 0.2                |
| <i>KRAS</i>   | 22 (2)                | 4 (1)                    | 9 (1)                                                               | 9 (3)                   | 2.28                              | 0.26               |
| <i>CEBPA</i>  | 13 (1)                | 3 (1)                    | 3 (0)                                                               | 7 (2)                   | 2.36                              | 0.34               |
| <i>JAK2</i>   | 35 (3)                | 12 (4)                   | 16 (3)                                                              | 7 (2)                   | 0.57                              | 0.35               |
| <i>RUNX1</i>  | 141 (11)              | 38 (12)                  | 58 (9)                                                              | 45 (14)                 | 1.21                              | 0.48               |
| <i>NF1</i>    | 19 (1)                | 3 (1)                    | 10 (2)                                                              | 6 (2)                   | 2.02                              | 0.5                |
| <i>BRCC3</i>  | 14 (1)                | 3 (1)                    | 5 (1)                                                               | 6 (2)                   | 2.02                              | 0.5                |
| <i>GATA2</i>  | 27 (2)                | 8 (3)                    | 14 (2)                                                              | 5 (2)                   | 0.62                              | 0.58               |
| <i>TET2</i>   | 177 (14)              | 45 (14)                  | 81 (13)                                                             | 51 (16)                 | 1.16                              | 0.58               |
| <i>NRAS</i>   | 51 (4)                | 14 (4)                   | 19 (3)                                                              | 18 (6)                  | 1.3                               | 0.59               |
| <i>BCOR</i>   | 64 (5)                | 18 (6)                   | 32 (5)                                                              | 14 (4)                  | 0.77                              | 0.59               |
| <i>CSF3R</i>  | 15 (1)                | 2 (1)                    | 9 (1)                                                               | 4 (1)                   | 2.01                              | 0.69               |
| <i>ETNK1</i>  | 18 (1)                | 5 (2)                    | 10 (2)                                                              | 3 (1)                   | 0.6                               | 0.72               |
| <i>IDH1</i>   | 22 (2)                | 7 (2)                    | 10 (2)                                                              | 5 (2)                   | 0.71                              | 0.77               |
| <i>CUX1</i>   | 28 (2)                | 8 (3)                    | 10 (2)                                                              | 10 (3)                  | 1.26                              | 0.81               |
| <i>ZRSR2</i>  | 30 (2)                | 10 (3)                   | 12 (2)                                                              | 8 (3)                   | 0.8                               | 0.81               |
| <i>IDH2</i>   | 41 (3)                | 13 (4)                   | 17 (3)                                                              | 11 (3)                  | 0.84                              | 0.84               |
| <i>ASXL1</i>  | 262 (21)              | 67 (21)                  | 125 (20)                                                            | 70 (22)                 | 1.06                              | 0.85               |
| <i>GNB1</i>   | 11 (1)                | 2 (1)                    | 6 (1)                                                               | 3 (1)                   | 1.5                               | 1                  |
| <i>PRPF8</i>  | 20 (2)                | 3 (1)                    | 13 (2)                                                              | 4 (1)                   | 1.34                              | 1                  |
| <i>SETBP1</i> | 72 (6)                | 20 (6)                   | 31 (5)                                                              | 21 (7)                  | 1.05                              | 1                  |
| <i>PTPN11</i> | 43 (3)                | 14 (4)                   | 15 (2)                                                              | 14 (4)                  | 1                                 | 1                  |
| <i>PHF6</i>   | 42 (3)                | 9 (3)                    | 24 (4)                                                              | 9 (3)                   | 1                                 | 1                  |

|               |        |        |        |        |      |   |
|---------------|--------|--------|--------|--------|------|---|
| <i>RAD21</i>  | 13 (1) | 3 (1)  | 7 (1)  | 3 (1)  | 1    | 1 |
| <i>BCORL1</i> | 11 (1) | 3 (1)  | 5 (1)  | 3 (1)  | 1    | 1 |
| <i>ETV6</i>   | 53 (4) | 16 (5) | 22 (3) | 15 (5) | 0.93 | 1 |
| <i>EZH2</i>   | 51 (4) | 14 (4) | 24 (4) | 13 (4) | 0.93 | 1 |
| <i>RIT1</i>   | 10 (1) | 4 (1)  | 3 (0)  | 3 (1)  | 0.75 | 1 |

Supplemental Table 5 – Distribution of conditioning regimens by telomere length quartiles

|                                       | <b>Telomere length quartile</b> |                          |                                                                     |                         |
|---------------------------------------|---------------------------------|--------------------------|---------------------------------------------------------------------|-------------------------|
|                                       | Total<br>n = 1267 (%)           | Shortest<br>n = 317 (25) | Intermediate (2 <sup>nd</sup> and 3 <sup>rd</sup> )<br>n = 633 (50) | Longest<br>n = 317 (25) |
| <b>Myeloablative conditioning</b>     |                                 |                          |                                                                     |                         |
| Cy/TBI/others                         | 4 (0)                           | 1 (0)                    | 2 (0)                                                               | 1 (0)                   |
| CY/TBI                                | 40 (3)                          | 12 (4)                   | 18 (3)                                                              | 10 (3)                  |
| TBI/others                            | 3 (0)                           | 1 (0)                    | -                                                                   | 2 (1)                   |
| Bu/Flu                                | 155 (12)                        | 31 (10)                  | 72 (11)                                                             | 52 (16)                 |
| Thiotepa based                        | 2 (0)                           | 1 (0)                    | 1 (0)                                                               | -                       |
| Bu/Cy/others                          | 2 (0)                           | 2 (1)                    | -                                                                   | -                       |
| Bu/Cy                                 | 144 (11)                        | 41 (13)                  | 69 (11)                                                             | 34 (11)                 |
| Bu/Flu + others                       | 36 (3)                          | 5 (2)                    | 19 (3)                                                              | 12 (4)                  |
| Bu + others                           | 168 (13)                        | 35 (11)                  | 97 (15)                                                             | 36 (11)                 |
| Flu/Melphalan                         | 7 (1)                           | 1 (0)                    | 6 (1)                                                               | -                       |
| Treosulfan                            | 8 (1)                           | 4 (1)                    | 4 (1)                                                               | -                       |
| Others                                | 13 (1)                          | 6 (2)                    | 3 (0)                                                               | 4 (1)                   |
| <b>Reduced-intensity conditioning</b> |                                 |                          |                                                                     |                         |
| <b>Flu/Mel-based</b>                  |                                 |                          |                                                                     |                         |
| Flu/Melphalan                         | 197 (16)                        | 41 (13)                  | 99 (16)                                                             | 57 (18)                 |
| Flu/Melphalan/others                  | 23 (2)                          | 8 (3)                    | 11 (2)                                                              | 4 (1)                   |
| <b>Other RIC</b>                      |                                 |                          |                                                                     |                         |
| Bu/Flu                                | 262 (21)                        | 75 (24)                  | 129 (20)                                                            | 58 (18)                 |
| TBI+others                            | 53 (4)                          | 16 (5)                   | 25 (4)                                                              | 12 (4)                  |
| Bu/Flu/others                         | 3 (0)                           | 1 (0)                    | 2 (0)                                                               | -                       |
| Bu/others                             | 2 (0)                           | -                        | 1 (0)                                                               | 1 (0)                   |
| Others                                | 15 (1)                          | 4 (1)                    | 7 (1)                                                               | 4 (1)                   |
| <b>Non-myeloablative conditioning</b> |                                 |                          |                                                                     |                         |
| TBI/Cy/Flu                            | 52 (4)                          | 7 (2)                    | 30 (5)                                                              | 15 (5)                  |
| TBI/Flu                               | 26 (2)                          | 9 (3)                    | 9 (1)                                                               | 8 (3)                   |
| Flu/Cy                                | 14 (1)                          | 5 (2)                    | 6 (1)                                                               | 3 (1)                   |
| Others                                | 29 (2)                          | 7 (2)                    | 19 (3)                                                              | 3 (1)                   |
| <b>Missing</b>                        | 9 (1)                           | 4 (1)                    | 4 (1)                                                               | 1 (0)                   |

Supplemental Table 6 – Reported causes of death according to telomere length groups and conditioning intensity

|                                  | <i>Shortest quartile</i> |              |              | <i>Intermediate (2<sup>nd</sup> and 3<sup>rd</sup>)</i> |              |              | <i>Longest quartile</i> |             |             |
|----------------------------------|--------------------------|--------------|--------------|---------------------------------------------------------|--------------|--------------|-------------------------|-------------|-------------|
|                                  | Total                    | RIC          | MAC          | Total                                                   | RIC          | MAC          | Total                   | RIC         | MAC         |
|                                  | n = 227 (%)              | n = 121 (53) | n = 106 (47) | n = 446 (%)                                             | n = 243 (54) | n = 203 (46) | n = 183 (%)             | n = 96 (52) | n = 87 (48) |
| Non-relapse mortality            |                          |              |              |                                                         |              |              |                         |             |             |
| GVHD                             | 34 (15)                  | 17 (7)       | 17 (7)       | 59 (13)                                                 | 35 (8)       | 24 (5)       | 19 (10)                 | 12 (7)      | 7 (4)       |
| Infection                        | 31 (13)                  | 15 (7)       | 16 (7)       | 54 (12)                                                 | 21 (5)       | 33 (7)       | 19 (10)                 | 7 (4)       | 12 (7)      |
| Other                            | 23 (10)                  | 12 (5)       | 11 (5)       | 50 (11)                                                 | 31 (7)       | 19 (4)       | 20 (11)                 | 10 (5)      | 10 (5)      |
| Organ failure                    | 15 (7)                   | 8 (3)        | 7 (3)        | 21 (5)                                                  | 9 (2)        | 12 (3)       | 16 (9)                  | 11 (6)      | 5 (3)       |
| Non-infectious pulmonary disease | 15 (7)                   | 7 (3)        | 8 (3)        | 27 (6)                                                  | 11 (2)       | 16 (4)       | 9 (5)                   | 2 (1)       | 7 (4)       |
| Primary disease                  | 11 (5)                   | 6 (3)        | 5 (2)        | 16 (4)                                                  | 10 (2)       | 6 (1)        | 7 (4)                   | 5 (3)       | 2 (1)       |
| Other malignancy                 | 4 (2)                    | 3 (1)        | 1 (0)        | 5 (1)                                                   | 4 (1)        | 1 (0)        | 1 (1)                   | 1 (1)       | -           |
| Relapse                          |                          |              |              |                                                         |              |              |                         |             |             |
| Primary disease                  | 66 (29)                  | 36 (16)      | 30 (13)      | 158 (35)                                                | 89 (20)      | 69 (15)      | 67 (37)                 | 35 (19)     | 32 (17)     |



Supplemental Table 7 – Association between Hematopoietic Cell Transplantation Comorbidity Index (HCT-CI) components and telomere length groups  
Comorbidities defined according to Sorror et al.<sup>2</sup>

|                                   | Telomere length quartile |                          |                                                                     |                         | <i>p</i> -value | <i>FDR</i><br>corrected<br><i>p</i> -value |
|-----------------------------------|--------------------------|--------------------------|---------------------------------------------------------------------|-------------------------|-----------------|--------------------------------------------|
|                                   | Total<br>n = 1267 (%)    | Shortest<br>n = 317 (25) | Intermediate (2 <sup>nd</sup> and 3 <sup>rd</sup> )<br>n = 633 (50) | Longest<br>n = 317 (25) |                 |                                            |
| <b>Infection</b>                  |                          |                          |                                                                     |                         |                 |                                            |
| No                                | 986 (78)                 | 223 (70)                 | 503 (79)                                                            | 260 (82)                | < 0.001†        | 0.004                                      |
| Yes                               | 57 (4)                   | 23 (7)                   | 28 (4)                                                              | 6 (2)                   |                 |                                            |
| Missing                           | 224 (18)                 | 71 (22)                  | 102 (16)                                                            | 51 (16)                 |                 |                                            |
| <b>Pulmonary</b>                  |                          |                          |                                                                     |                         |                 |                                            |
| No                                | 617 (49)                 | 129 (41)                 | 308 (49)                                                            | 180 (57)                | < 0.001‡        | 0.004                                      |
| Moderate                          | 265 (21)                 | 68 (21)                  | 145 (23)                                                            | 52 (16)                 |                 |                                            |
| Severe                            | 161 (13)                 | 49 (15)                  | 78 (12)                                                             | 34 (11)                 |                 |                                            |
| Missing                           | 224 (18)                 | 71 (22)                  | 102 (16)                                                            | 51 (16)                 |                 |                                            |
| <b>Hepatic</b>                    |                          |                          |                                                                     |                         |                 |                                            |
| No                                | 960 (76)                 | 220 (69)                 | 482 (76)                                                            | 258 (81)                | 0.001‡          | 0.008                                      |
| Mild                              | 65 (5)                   | 23 (7)                   | 35 (6)                                                              | 7 (2)                   |                 |                                            |
| Moderate/severe                   | 18 (1)                   | 3 (1)                    | 14 (2)                                                              | 1 (0)                   |                 |                                            |
| Missing                           | 224 (18)                 | 71 (22)                  | 102 (16)                                                            | 51 (16)                 |                 |                                            |
| <b>Prior solid tumor</b>          |                          |                          |                                                                     |                         |                 |                                            |
| No                                | 856 (68)                 | 211 (67)                 | 434 (69)                                                            | 211 (67)                | 0.07†           | 0.21                                       |
| Yes                               | 186 (15)                 | 35 (11)                  | 97 (15)                                                             | 54 (17)                 |                 |                                            |
| Missing                           | 225 (18)                 | 71 (22)                  | 102 (16)                                                            | 52 (16)                 |                 |                                            |
| <b>Arrhythmia</b>                 |                          |                          |                                                                     |                         |                 |                                            |
| No                                | 984 (78)                 | 231 (73)                 | 495 (78)                                                            | 258 (81)                | 0.07†           | 0.21                                       |
| Yes                               | 55 (4)                   | 15 (5)                   | 33 (5)                                                              | 7 (2)                   |                 |                                            |
| Missing                           | 228 (18)                 | 71 (22)                  | 105 (17)                                                            | 52 (16)                 |                 |                                            |
| <b>Cardiac</b>                    |                          |                          |                                                                     |                         |                 |                                            |
| No                                | 876 (69)                 | 201 (63)                 | 443 (70)                                                            | 232 (73)                | 0.09†           | 0.21                                       |
| Yes                               | 165 (13)                 | 45 (14)                  | 86 (14)                                                             | 34 (11)                 |                 |                                            |
| Missing                           | 226 (18)                 | 71 (22)                  | 104 (16)                                                            | 51 (16)                 |                 |                                            |
| <b>Diabetes</b>                   |                          |                          |                                                                     |                         |                 |                                            |
| No                                | 891 (70)                 | 208 (66)                 | 445 (70)                                                            | 238 (75)                | 0.10†           | 0.22                                       |
| Yes                               | 150 (12)                 | 38 (12)                  | 84 (13)                                                             | 28 (9)                  |                 |                                            |
| Missing                           | 226 (18)                 | 71 (22)                  | 104 (16)                                                            | 51 (16)                 |                 |                                            |
| <b>Renal</b>                      |                          |                          |                                                                     |                         |                 |                                            |
| No                                | 1,033 (82)               | 244 (77)                 | 528 (83)                                                            | 261 (82)                | 0.20†           | 0.38                                       |
| Yes                               | 10 (1)                   | 2 (1)                    | 3 (0)                                                               | 5 (2)                   |                 |                                            |
| Missing                           | 224 (18)                 | 71 (22)                  | 102 (16)                                                            | 51 (16)                 |                 |                                            |
| <b>Inflammatory Bowel Disease</b> |                          |                          |                                                                     |                         |                 |                                            |

|                            |            |          |          |          |       |      |
|----------------------------|------------|----------|----------|----------|-------|------|
| No                         | 1,028 (81) | 242 (76) | 526 (83) | 260 (82) | 0.52† | 0.77 |
| Yes                        | 15 (1)     | 4 (1)    | 5 (1)    | 6 (2)    |       |      |
| Missing                    | 224 (18)   | 71 (22)  | 102 (16) | 51 (16)  |       |      |
| <b>Psychiatric</b>         |            |          |          |          |       |      |
| No                         | 847 (67)   | 205 (65) | 424 (67) | 218 (69) | 0.65† | 0.77 |
| Yes                        | 194 (15)   | 40 (13)  | 106 (17) | 48 (15)  |       |      |
| Missing                    | 226 (18)   | 72 (23)  | 103 (16) | 51 (16)  |       |      |
| <b>Obesity</b>             |            |          |          |          |       |      |
| No                         | 942 (74)   | 228 (72) | 471 (74) | 243 (77) | 0.66† | 0.77 |
| Yes                        | 100 (8)    | 18 (6)   | 59 (9)   | 23 (7)   |       |      |
| Missing                    | 225 (18)   | 71 (22)  | 103 (16) | 51 (16)  |       |      |
| <b>Cerebrovascular</b>     |            |          |          |          |       |      |
| No                         | 1,015 (80) | 241 (76) | 512 (81) | 262 (83) | 0.67† | 0.77 |
| Yes                        | 24 (2)     | 5 (2)    | 15 (2)   | 4 (1)    |       |      |
| Missing                    | 228 (18)   | 71 (22)  | 106 (17) | 51 (16)  |       |      |
| <b>Rheumatologic</b>       |            |          |          |          |       |      |
| No                         | 1,010 (80) | 239 (75) | 512 (81) | 259 (82) | 0.68† | 0.77 |
| Yes                        | 32 (3)     | 7 (2)    | 19 (3)   | 6 (2)    |       |      |
| Missing                    | 225 (18)   | 71 (22)  | 102 (16) | 52 (16)  |       |      |
| <b>Peptic Ulcer</b>        |            |          |          |          |       |      |
| No                         | 1,024 (81) | 242 (76) | 520 (82) | 262 (83) | 0.90† | 0.90 |
| Yes                        | 18 (1)     | 4 (1)    | 10 (2)   | 4 (1)    |       |      |
| Missing                    | 225 (18)   | 71 (22)  | 103 (16) | 51 (16)  |       |      |
| <b>Heart valve disease</b> |            |          |          |          |       |      |
| No                         | 1,019 (80) | 240 (76) | 519 (82) | 260 (82) | 0.90† | 0.90 |
| Yes                        | 22 (2)     | 6 (2)    | 10 (2)   | 6 (2)    |       |      |
| Missing                    | 226 (18)   | 71 (22)  | 104 (16) | 51 (16)  |       |      |

\*Kruskal-Wallis trend test, ‡Jonckheere-Terpstra test

Supplemental Table 8 – Patient characteristics by telomere length quartiles in patients with HCT-CI score 0 who received myeloablative conditioning

|                                                  | Telomere length quartile |                         |                                                                    |                        | p-value              |
|--------------------------------------------------|--------------------------|-------------------------|--------------------------------------------------------------------|------------------------|----------------------|
|                                                  | Total<br>n = 86 (%)      | Shortest<br>n = 19 (22) | Intermediate (2 <sup>nd</sup> and 3 <sup>rd</sup> )<br>n = 37 (43) | Longest<br>n = 30 (35) |                      |
| <b>Patient-related variables</b>                 |                          |                         |                                                                    |                        |                      |
| Recipient age                                    |                          |                         |                                                                    |                        |                      |
| Median (range)                                   | 55.1 (40.0 - 75.1)       | 53.4 (42.4 - 69.9)      | 57.8 (40.9 - 75.1)                                                 | 53.2 (40.0 - 71.1)     | > 0.99 <sup>^</sup>  |
| Recipient sex                                    |                          |                         |                                                                    |                        |                      |
| Male                                             | 51 (59)                  | 11 (58)                 | 24 (65)                                                            | 16 (53)                | 0.62 <sup>†</sup>    |
| Female                                           | 35 (41)                  | 8 (42)                  | 13 (35)                                                            | 14 (47)                |                      |
| Karnofsky performance-status score               |                          |                         |                                                                    |                        |                      |
| 90-100                                           | 60 (70)                  | 12 (63)                 | 26 (70)                                                            | 22 (73)                | 0.66 <sup>†</sup>    |
| 10-80                                            | 15 (17)                  | 4 (21)                  | 6 (16)                                                             | 5 (17)                 |                      |
| Missing                                          | 11 (13)                  | 3 (16)                  | 5 (14)                                                             | 3 (10)                 |                      |
| Telomere length                                  |                          |                         |                                                                    |                        |                      |
| Median (range)                                   | 0.5 (0.3 - 0.9)          | 0.4 (0.3 - 0.4)         | 0.5 (0.4 - 0.6)                                                    | 0.6 (0.6 - 0.9)        | < 0.001 <sup>^</sup> |
| <b>Disease-related variables</b>                 |                          |                         |                                                                    |                        |                      |
| IPSS-R                                           |                          |                         |                                                                    |                        |                      |
| Very low                                         | 10 (12)                  | -                       | 6 (16)                                                             | 4 (13)                 | 0.12 <sup>‡</sup>    |
| Low                                              | 25 (29)                  | 4 (21)                  | 10 (27)                                                            | 11 (37)                |                      |
| Intermediate                                     | 18 (21)                  | 7 (37)                  | 7 (19)                                                             | 4 (13)                 |                      |
| High                                             | 11 (13)                  | 2 (11)                  | 5 (14)                                                             | 4 (13)                 |                      |
| Very high                                        | 7 (8)                    | 1 (5)                   | 5 (14)                                                             | 1 (3)                  |                      |
| Missing                                          | 15 (17)                  | 5 (26)                  | 4 (11)                                                             | 6 (20)                 |                      |
| IPSS-R Cytogenetic risk group                    |                          |                         |                                                                    |                        |                      |
| Good                                             | 46 (53)                  | 10 (53)                 | 16 (43)                                                            | 20 (67)                | 0.45 <sup>‡</sup>    |
| Intermediate                                     | 10 (12)                  | 3 (16)                  | 6 (16)                                                             | 1 (3)                  |                      |
| Poor                                             | 13 (15)                  | 3 (16)                  | 7 (19)                                                             | 3 (10)                 |                      |
| Very poor                                        | 7 (8)                    | 1 (5)                   | 4 (11)                                                             | 2 (7)                  |                      |
| Unknown                                          | 10 (12)                  | 2 (11)                  | 4 (11)                                                             | 4 (13)                 |                      |
| Absolute neutrophil count (x 10 <sup>9</sup> /L) |                          |                         |                                                                    |                        |                      |
| Median (Interquartile Range)                     | 1.3 (0.6-2.7)            | 1.4 (1.0-2.5)           | 1.1 (0.5-2.6)                                                      | 1.7 (0.7-2.7)          | 0.47 <sup>^</sup>    |
| Hemoglobin (g/dL)                                |                          |                         |                                                                    |                        |                      |
| Median (Interquartile Range)                     | 10.1 (8.9-12.1)          | 9.4 (9.0-10.1)          | 10.4 (9.5-13.0)                                                    | 10.7 (8.9-12.0)        | 0.06 <sup>^</sup>    |
| Platelet count (x 10 <sup>9</sup> /L)            |                          |                         |                                                                    |                        |                      |

|                                     |             |             |              |              |                   |
|-------------------------------------|-------------|-------------|--------------|--------------|-------------------|
| Median (Interquartile Range)        | 87 (47-205) | 48 (32-112) | 111 (58-218) | 101 (66-207) | 0.04 <sup>^</sup> |
| <b>Bone marrow blasts (%)</b>       |             |             |              |              |                   |
| Median (Interquartile Range)        | 3 (1-6)     | 3 (1-6)     | 3 (1-6)      | 3 (1-5)      | 0.80 <sup>^</sup> |
| <b>Monosomal karyotype</b>          |             |             |              |              |                   |
| No                                  | 68 (79)     | 15 (79)     | 28 (76)      | 25 (83)      | 0.79 <sup>†</sup> |
| Yes                                 | 11 (13)     | 2 (11)      | 7 (19)       | 2 (7)        |                   |
| Unknown                             | 7 (8)       | 2 (11)      | 2 (5)        | 3 (10)       |                   |
| <b>Prior MDS therapy</b>            |             |             |              |              |                   |
| None                                | 19 (22)     | 6 (32)      | 6 (16)       | 7 (23)       | 0.92 <sup>†</sup> |
| HMA only                            | 55 (64)     | 11 (58)     | 25 (68)      | 19 (63)      |                   |
| Chemotherapy                        | 8 (9)       | 1 (5)       | 5 (14)       | 2 (7)        |                   |
| Missing                             | 4 (5)       | 1 (5)       | 1 (3)        | 2 (7)        |                   |
| <b>Therapy-related MDS</b>          |             |             |              |              |                   |
| De Novo MDS                         | 85 (99)     | 18 (95)     | 37 (100)     | 30 (100)     | 0.15 <sup>†</sup> |
| t-MDS                               | 1 (1)       | 1 (5)       | -            | -            |                   |
| <b>JAK2 V617F</b>                   |             |             |              |              |                   |
| No mutation                         | 82 (95)     | 18 (95)     | 34 (92)      | 30 (100)     | 0.27 <sup>†</sup> |
| Mutation                            | 4 (5)       | 1 (5)       | 3 (8)        | -            |                   |
| <b>Transplant-related variables</b> |             |             |              |              |                   |
| <b>Graft type</b>                   |             |             |              |              |                   |
| Bone marrow                         | 15 (17)     | 4 (21)      | 6 (16)       | 5 (17)       | 0.35 <sup>†</sup> |
| PBSC                                | 66 (77)     | 15 (79)     | 29 (78)      | 22 (73)      |                   |
| Cord Blood                          | 5 (6)       | -           | 2 (5)        | 3 (10)       |                   |
| <b>Donor group</b>                  |             |             |              |              |                   |
| Matched, related                    | 4 (5)       | 1 (5)       | 2 (5)        | 1 (3)        | 0.32 <sup>†</sup> |
| Matched, unrelated                  | 53 (62)     | 14 (74)     | 23 (62)      | 16 (53)      |                   |
| Mismatched                          | 24 (28)     | 4 (21)      | 10 (27)      | 10 (33)      |                   |
| Cord Blood                          | 5 (6)       | -           | 2 (5)        | 3 (10)       |                   |
| <b>Donor age</b>                    |             |             |              |              |                   |
| Under 35                            | 55 (64)     | 9 (47)      | 24 (65)      | 22 (73)      | 0.08 <sup>†</sup> |
| 35 or over                          | 31 (36)     | 10 (53)     | 13 (35)      | 8 (27)       |                   |
| <b>Donor sex</b>                    |             |             |              |              |                   |
| Male                                | 65 (76)     | 17 (89)     | 28 (76)      | 20 (67)      | 0.08 <sup>†</sup> |
| Female                              | 17 (20)     | 2 (11)      | 6 (16)       | 9 (30)       |                   |
| Missing                             | 4 (5)       | -           | 3 (8)        | 1 (3)        |                   |
| <b>Sex match (donor/recipient)</b>  |             |             |              |              |                   |
| Male/Male                           | 39 (45)     | 11 (58)     | 17 (46)      | 11 (37)      | 0.29 <sup>†</sup> |

|                          |          |          |          |          |         |
|--------------------------|----------|----------|----------|----------|---------|
| Male/Female              | 26 (30)  | 6 (32)   | 11 (30)  | 9 (30)   |         |
| Female/Male              | 10 (12)  | -        | 5 (14)   | 5 (17)   |         |
| Female/Female            | 7 (8)    | 2 (11)   | 1 (3)    | 4 (13)   |         |
| Missing                  | 4 (5)    | -        | 3 (8)    | 1 (3)    |         |
| in vivo T-cell depletion |          |          |          |          |         |
| No                       | 49 (57)  | 11 (58)  | 23 (62)  | 15 (50)  | 0.48†   |
| Yes                      | 37 (43)  | 8 (42)   | 14 (38)  | 15 (50)  |         |
| GVHD prophylaxis         |          |          |          |          |         |
| None reported            | 2 (2)    | 1 (5)    | -        | 1 (3)    | > 0.99† |
| Ex vivo T-cell depletion | 4 (5)    | 1 (5)    | 1 (3)    | 2 (7)    |         |
| CD34 selection           | 67 (78)  | 14 (74)  | 30 (81)  | 23 (77)  |         |
| Tacrolimus-based         | 10 (12)  | 2 (11)   | 5 (14)   | 3 (10)   |         |
| CSA-based                | 3 (3)    | 1 (5)    | 1 (3)    | 1 (3)    |         |
| Other                    | 1 (2)    |          | 1 (3)    | -        |         |
| Year of transplantation  |          |          |          |          |         |
| >2007                    | 86 (100) | 19 (100) | 37 (100) | 30 (100) | -       |

†Kruskal-Wallis trend test, ‡Jonckheere-Terpstra test, ^Cuzick's trend test

Supplemental Table 9 – GvHD prophylaxis by telomere quartiles and conditioning intensity

|                                   | Telomere length quartile |                          |                                            |                         | P value |
|-----------------------------------|--------------------------|--------------------------|--------------------------------------------|-------------------------|---------|
|                                   | Total<br>n = 1267 (%)    | Shortest<br>n = 317 (25) | Intermediate (2nd and 3rd)<br>n = 633 (50) | Longest<br>n = 317 (25) |         |
| <b>Myeloablative conditioning</b> | n = 582 (%)              | n = 140 (24)             | n = 291 (50)                               | n = 151 (26)            |         |
| Tacrolimus-based                  | 496 (85)                 | 121 (86)                 | 247 (85)                                   | 128 (85)                | 0.84    |
| CSA-based                         | 35 (6)                   | 8 (6)                    | 19 (7)                                     | 8 (5)                   |         |
| CD34 selection                    | 19 (3)                   | 2 (1)                    | 11 (4)                                     | 6 (4)                   |         |
| Cyclophosphamide-based            | 9 (2)                    | 2 (1)                    | 6 (2)                                      | 1 (1)                   |         |
| Ex vivo T-cell depletion          | 11 (2)                   | 2 (1)                    | 6 (2)                                      | 3 (2)                   |         |
| Other                             | 9 (2)                    | 4 (3)                    | 2 (1)                                      | 3 (2)                   |         |
| None reported                     | 3 (1)                    | 1 (1)                    | -                                          | 2 (1)                   |         |
| <b>RIC - Flu/Mel</b>              | n = 220 (%)              | n = 49 (22)              | n = 110 (50)                               | n = 61 (28)             |         |
| Tacrolimus-based                  | 176 (80)                 | 36 (73)                  | 94 (85)                                    | 46 (75)                 | 0.51    |
| CSA-based                         | 22 (10)                  | 8 (16)                   | 8 (7)                                      | 6 (10)                  |         |
| CD34 selection                    | 4 (2)                    | 1 (2)                    | 2 (2)                                      | 1 (2)                   |         |
| Cyclophosphamide-based            | 4 (2)                    | 2 (4)                    | 1 (1)                                      | 1 (2)                   |         |
| Ex vivo T-cell depletion          | 1 (0)                    | -                        | 1 (1)                                      | -                       |         |
| Other                             | 8 (4)                    | 2 (4)                    | 2 (2)                                      | 4 (7)                   |         |
| None reported                     | 5 (2)                    | -                        | 2 (2)                                      | 3 (5)                   |         |
| <b>Other RIC</b>                  | n = 335 (%)              | n = 96 (29)              | n = 164 (49)                               | n = 75 (22)             |         |
| Tacrolimus-based                  | 258 (77)                 | 76 (79)                  | 125 (76)                                   | 57 (76)                 | 0.45    |
| CSA-based                         | 48 (14)                  | 10 (10)                  | 26 (16)                                    | 12 (16)                 |         |
| CD34 selection                    | 3 (1)                    | 2 (2)                    | -                                          | 1 (1)                   |         |
| Cyclophosphamide-based            | 2 (1)                    | -                        | 1 (1)                                      | 1 (1)                   |         |
| Ex vivo T-cell depletion          | 4 (1)                    | 3 (3)                    | -                                          | 1 (1)                   |         |
| Other                             | 12 (4)                   | 3 (3)                    | 9 (5)                                      | -                       |         |
| None reported                     | 8 (2)                    | 2 (2)                    | 3 (2)                                      | 3 (4)                   |         |

†Kruskal-Wallis rank-sum test

Supplemental Table 10 – Patient characteristics according to telomere length quartiles among patients who received myeloablative conditioning regimen

|                                                      | Telomere length quartile |                          |                                                                     |                         | P value              |
|------------------------------------------------------|--------------------------|--------------------------|---------------------------------------------------------------------|-------------------------|----------------------|
|                                                      | Total<br>n = 582 (%)     | Shortest<br>n = 140 (24) | Intermediate (2 <sup>nd</sup> and 3 <sup>rd</sup> )<br>n = 291 (50) | Longest<br>n = 151 (26) |                      |
| <b>Patient-related variables</b>                     |                          |                          |                                                                     |                         |                      |
| Recipient age                                        |                          |                          |                                                                     |                         |                      |
| Median (range)                                       | 57 (40 - 75)             | 57 (40 - 75)             | 58 (40 - 75)                                                        | 56 (40 - 72)            | 0.34 <sup>^</sup>    |
| Recipient sex                                        |                          |                          |                                                                     |                         |                      |
| Male                                                 | 351 (60)                 | 94 (67)                  | 174 (60)                                                            | 83 (55)                 | 0.04 <sup>†</sup>    |
| Female                                               | 231 (40)                 | 46 (33)                  | 117 (40)                                                            | 68 (45)                 |                      |
| Karnofsky performance-status score                   |                          |                          |                                                                     |                         |                      |
| 90-100                                               | 307 (53)                 | 66 (47)                  | 152 (52)                                                            | 89 (59)                 | 0.08 <sup>†</sup>    |
| 10-80                                                | 153 (26)                 | 40 (29)                  | 80 (27)                                                             | 33 (22)                 |                      |
| Missing                                              | 122 (21)                 | 34 (24)                  | 59 (20)                                                             | 29 (19)                 |                      |
| Hematopoietic Cell Transplantation Comorbidity Index |                          |                          |                                                                     |                         |                      |
| 0                                                    | 86 (15)                  | 19 (14)                  | 37 (13)                                                             | 30 (20)                 | 0.34 <sup>‡</sup>    |
| 1-2                                                  | 95 (16)                  | 21 (15)                  | 53 (18)                                                             | 21 (14)                 |                      |
| >/= 3                                                | 203 (35)                 | 46 (33)                  | 107 (37)                                                            | 50 (33)                 |                      |
| Missing                                              | 198 (34)                 | 54 (39)                  | 94 (32)                                                             | 50 (33)                 |                      |
| <b>Disease-related variables</b>                     |                          |                          |                                                                     |                         |                      |
| IPSS-R                                               |                          |                          |                                                                     |                         |                      |
| Very low                                             | 45 (8)                   | 5 (4)                    | 26 (9)                                                              | 14 (9)                  | <0.001 <sup>‡</sup>  |
| Low                                                  | 117 (20)                 | 12 (9)                   | 63 (22)                                                             | 42 (28)                 |                      |
| Intermediate                                         | 125 (21)                 | 29 (21)                  | 72 (25)                                                             | 24 (16)                 |                      |
| High                                                 | 80 (14)                  | 29 (21)                  | 36 (12)                                                             | 15 (10)                 |                      |
| Very high                                            | 76 (13)                  | 24 (17)                  | 36 (12)                                                             | 16 (11)                 |                      |
| Missing                                              | 139 (24)                 | 41 (29)                  | 58 (20)                                                             | 40 (26)                 |                      |
| IPSS-R Cytogenetic risk group                        |                          |                          |                                                                     |                         |                      |
| Very good                                            | 5 (1)                    | 2 (1)                    | 3 (1)                                                               | -                       | 0.86 <sup>‡</sup>    |
| Good                                                 | 211 (36)                 | 47 (34)                  | 106 (36)                                                            | 58 (38)                 |                      |
| Intermediate                                         | 83 (14)                  | 19 (14)                  | 46 (16)                                                             | 18 (12)                 |                      |
| Poor                                                 | 99 (17)                  | 25 (18)                  | 49 (17)                                                             | 25 (17)                 |                      |
| Very poor                                            | 65 (11)                  | 17 (12)                  | 33 (11)                                                             | 15 (10)                 |                      |
| Unknown                                              | 119 (20)                 | 30 (21)                  | 54 (19)                                                             | 35 (23)                 |                      |
| Absolute neutrophil count (x 10 <sup>9</sup> /L)     |                          |                          |                                                                     |                         |                      |
| Median (Interquartile Range)                         | 1.3 (0.6-2.3)            | 0.9 (0.4-1.7)            | 1.3 (0.5-2.4)                                                       | 1.5 (0.7-2.7)           | < 0.001 <sup>^</sup> |
| Hemoglobin (g/dL)                                    |                          |                          |                                                                     |                         |                      |
| Median (Interquartile Range)                         | 9.5 (8.3-11.4)           | 8.9 (8.0-10.1)           | 9.6 (8.5-11.8)                                                      | 10.2 (8.6-11.8)         | < 0.001 <sup>^</sup> |
| Platelet count (x 10 <sup>9</sup> /L)                |                          |                          |                                                                     |                         |                      |
| Median (Interquartile Range)                         | 79 (35-153)              | 50 (19-94)               | 86 (32-176)                                                         | 98 (58-173)             | < 0.001 <sup>^</sup> |

|                                                     |                   |                   |                   |                   |                    |
|-----------------------------------------------------|-------------------|-------------------|-------------------|-------------------|--------------------|
| Bone marrow blasts (%)                              |                   |                   |                   |                   |                    |
| Median (Interquartile range)                        | 3 (1-6)           | 4 (2-8)           | 2 (1-6)           | 2 (1-5)           | 0.009 <sup>^</sup> |
| Monosomal karyotype                                 |                   |                   |                   |                   |                    |
| No                                                  | 400 (69)          | 92 (66)           | 204 (70)          | 104 (69)          | 0.75 <sup>†</sup>  |
| Yes                                                 | 94 (16)           | 22 (16)           | 48 (16)           | 24 (16)           |                    |
| Unknown                                             | 88 (15)           | 26 (19)           | 39 (13)           | 23 (15)           |                    |
| Prior MDS therapy                                   |                   |                   |                   |                   |                    |
| None                                                | 188 (32)          | 54 (39)           | 83 (29)           | 51 (34)           | 0.34 <sup>†</sup>  |
| HMA only                                            | 291 (50)          | 67 (48)           | 153 (53)          | 71 (47)           |                    |
| Chemotherapy                                        | 44 (8)            | 5 (4)             | 27 (9)            | 12 (8)            |                    |
| Missing                                             | 59 (10)           | 14 (10)           | 28 (10)           | 17 (11)           |                    |
| Therapy-related MDS                                 |                   |                   |                   |                   |                    |
| De Novo MDS                                         | 451 (77)          | 107 (76)          | 229 (79)          | 115 (76)          | 0.94 <sup>†</sup>  |
| t-MDS                                               | 131 (23)          | 33 (24)           | 62 (21)           | 36 (24)           |                    |
| Time from MDS diagnosis to transplantation (Months) |                   |                   |                   |                   |                    |
| Median (range)                                      | 7.5 (0.9 – 163.2) | 7.7 (0.9 – 130.4) | 7.5 (1.8 – 163.2) | 6.8 (1.9 – 116.3) | 0.41 <sup>^</sup>  |
| <b>Transplant-related variables</b>                 |                   |                   |                   |                   |                    |
| Graft type                                          |                   |                   |                   |                   |                    |
| Bone marrow                                         | 97 (17)           | 25 (18)           | 51 (18)           | 21 (14)           | 0.27 <sup>†</sup>  |
| PBSC                                                | 455 (78)          | 109 (78)          | 224 (77)          | 122 (81)          |                    |
| Cord Blood                                          | 26 (4)            | 4 (3)             | 14 (5)            | 8 (5)             |                    |
| Other                                               | 4 (1)             | 2 (1)             | 2 (1)             | -                 |                    |
| Donor group                                         |                   |                   |                   |                   |                    |
| Matched, Related                                    | 95 (16)           | 21 (15)           | 47 (16)           | 27 (18)           | 0.48 <sup>†</sup>  |
| Matched, Unrelated                                  | 345 (59)          | 83 (59)           | 172 (59)          | 90 (60)           |                    |
| Mismatched                                          | 116 (20)          | 32 (23)           | 58 (20)           | 26 (17)           |                    |
| Cord Blood                                          | 26 (4)            | 4 (3)             | 14 (5)            | 8 (5)             |                    |
| Donor age                                           |                   |                   |                   |                   |                    |
| <35                                                 | 314 (54)          | 76 (54)           | 160 (55)          | 78 (52)           | 0.64 <sup>†</sup>  |
| ≥35                                                 | 265 (46)          | 63 (45)           | 130 (45)          | 72 (48)           |                    |
| Missing                                             | 3 (1)             | 1 (1)             | 1 (0)             | 1 (1)             |                    |
| Donor sex                                           |                   |                   |                   |                   |                    |
| Male                                                | 371 (64)          | 87 (62)           | 191 (66)          | 93 (62)           | 0.81 <sup>†</sup>  |
| Female                                              | 162 (28)          | 44 (31)           | 74 (25)           | 44 (29)           |                    |
| Missing                                             | 49 (8)            | 9 (6)             | 26 (9)            | 14 (9)            |                    |
| Sex match (Donor/Recipient)                         |                   |                   |                   |                   |                    |
| Male/Male                                           | 231 (40)          | 61 (44)           | 116 (40)          | 54 (36)           | 0.22 <sup>†</sup>  |
| Male/Female                                         | 140 (24)          | 26 (19)           | 75 (26)           | 39 (26)           |                    |
| Female/Male                                         | 87 (15)           | 26 (19)           | 41 (14)           | 20 (13)           |                    |
| Female/Female                                       | 75 (13)           | 18 (13)           | 33 (11)           | 24 (16)           |                    |
| Missing                                             | 49 (8)            | 9 (6)             | 26 (9)            | 14 (9)            |                    |
| in vivo T-cell depletion                            |                   |                   |                   |                   |                    |



|                                |          |          |          |          |              |
|--------------------------------|----------|----------|----------|----------|--------------|
| No                             | 335 (58) | 90 (64)  | 170 (58) | 75 (50)  | <i>0.03†</i> |
| Yes                            | 208 (36) | 44 (31)  | 101 (35) | 63 (42)  |              |
| Missing                        | 39 (7)   | 6 (4)    | 20 (7)   | 13 (9)   |              |
| <b>GVHD prophylaxis</b>        |          |          |          |          |              |
| None reported                  | 3 (1)    | 1 (1)    | -        | 2 (1)    | <i>0.84†</i> |
| Ex vivo T-cell depletion       | 11 (2)   | 2 (1)    | 6 (2)    | 3 (2)    |              |
| CD34 selection                 | 19 (3)   | 2 (1)    | 11 (4)   | 6 (4)    |              |
| Cyclophosphamide-based         | 9 (2)    | 2 (1)    | 6 (2)    | 1 (1)    |              |
| Tacrolimus-based               | 496 (85) | 121 (86) | 247 (85) | 128 (85) |              |
| CSA-based                      | 35 (6)   | 8 (6)    | 19 (7)   | 8 (5)    |              |
| Other                          | 9 (2)    | 4 (3)    | 2 (1)    | 3 (2)    |              |
| <b>Year of transplantation</b> |          |          |          |          |              |
| ≤2007                          | 114 (20) | 36 (26)  | 51 (18)  | 27 (18)  | <i>0.10†</i> |
| >2007                          | 468 (80) | 104 (74) | 240 (82) | 124 (82) |              |

†Kruskal-Wallis trend test, ‡Jonckheere-Terpstra test, ^Cuzick's trend test

Supplemental Table 11 – Patient characteristics according to telomere length quartiles among patients who received reduced-intensity conditioning regimen

|                                                      | Telomere length quartile |                          |                                                                     |                         | P value              |
|------------------------------------------------------|--------------------------|--------------------------|---------------------------------------------------------------------|-------------------------|----------------------|
|                                                      | Total<br>n = 555 (%)     | Shortest<br>n = 145 (26) | Intermediate (2 <sup>nd</sup> and 3 <sup>rd</sup> )<br>n = 274 (49) | Longest<br>n = 136 (25) |                      |
| <b>Patient-related variables</b>                     |                          |                          |                                                                     |                         |                      |
| Recipient age                                        |                          |                          |                                                                     |                         |                      |
| Median (range)                                       | 63 (40 - 77)             | 63 (40 - 77)             | 63 (40 - 77)                                                        | 63 (40 - 76)            | 0.50 <sup>^</sup>    |
| Recipient sex                                        |                          |                          |                                                                     |                         |                      |
| Male                                                 | 343 (62)                 | 101 (70)                 | 169 (62)                                                            | 73 (54)                 | 0.006 <sup>†</sup>   |
| Female                                               | 212 (38)                 | 44 (30)                  | 105 (38)                                                            | 63 (46)                 |                      |
| Karnofsky performance-status score                   |                          |                          |                                                                     |                         |                      |
| 90-100                                               | 252 (45)                 | 67 (46)                  | 118 (43)                                                            | 67 (49)                 | 0.72 <sup>†</sup>    |
| 10-80                                                | 205 (37)                 | 52 (36)                  | 106 (39)                                                            | 47 (35)                 |                      |
| Missing                                              | 98 (18)                  | 26 (18)                  | 50 (18)                                                             | 22 (16)                 |                      |
| Hematopoietic Cell Transplantation Comorbidity Index |                          |                          |                                                                     |                         |                      |
| 0                                                    | 75 (14)                  | 15 (10)                  | 40 (15)                                                             | 20 (15)                 | 0.04 <sup>‡</sup>    |
| 1-2                                                  | 116 (21)                 | 25 (17)                  | 57 (21)                                                             | 34 (25)                 |                      |
| >/= 3                                                | 239 (43)                 | 70 (48)                  | 118 (43)                                                            | 51 (38)                 |                      |
| Missing                                              | 125 (23)                 | 35 (24)                  | 59 (22)                                                             | 31 (23)                 |                      |
| <b>Disease-related variables</b>                     |                          |                          |                                                                     |                         |                      |
| IPSS-R                                               |                          |                          |                                                                     |                         |                      |
| Very low                                             | 48 (9)                   | 14 (10)                  | 23 (8)                                                              | 11 (8)                  | 0.48 <sup>‡</sup>    |
| Low                                                  | 107 (19)                 | 19 (13)                  | 61 (22)                                                             | 27 (20)                 |                      |
| Intermediate                                         | 132 (24)                 | 38 (26)                  | 60 (22)                                                             | 34 (25)                 |                      |
| High                                                 | 87 (16)                  | 24 (17)                  | 40 (15)                                                             | 23 (17)                 |                      |
| Very high                                            | 47 (8)                   | 11 (8)                   | 29 (11)                                                             | 7 (5)                   |                      |
| Missing                                              | 134 (24)                 | 39 (27)                  | 61 (22)                                                             | 34 (25)                 |                      |
| IPSS-R Cytogenetic risk group                        |                          |                          |                                                                     |                         |                      |
| Very good                                            | 4 (1)                    | 1 (1)                    | -                                                                   | 3 (2)                   | 0.55 <sup>‡</sup>    |
| Good                                                 | 227 (41)                 | 56 (39)                  | 115 (42)                                                            | 56 (41)                 |                      |
| Intermediate                                         | 88 (16)                  | 26 (18)                  | 37 (14)                                                             | 25 (18)                 |                      |
| Poor                                                 | 89 (16)                  | 23 (16)                  | 52 (19)                                                             | 14 (10)                 |                      |
| Very poor                                            | 40 (7)                   | 11 (8)                   | 18 (7)                                                              | 11 (8)                  |                      |
| Unknown                                              | 107 (19)                 | 28 (19)                  | 52 (19)                                                             | 27 (20)                 |                      |
| Absolute neutrophil count (x 109/L)                  |                          |                          |                                                                     |                         |                      |
| Median (Interquartile Range)                         | 1.1 (0.5-2.3)            | 0.8 (0.4-1.7)            | 1.2 (0.5-2.3)                                                       | 1.5 (0.7-3.0)           | < 0.001 <sup>^</sup> |
| Hemoglobin (g/dL)                                    |                          |                          |                                                                     |                         |                      |
| Median (Interquartile Range)                         | 9.4 (8.2-11.0)           | 9.1 (8.2-10.2)           | 9.6 (8.1-11.2)                                                      | 9.7 (8.2-11.2)          | 0.07 <sup>^</sup>    |
| Platelet count (x 109/L)                             |                          |                          |                                                                     |                         |                      |
| Median (Interquartile Range)                         | 75 (31-145)              | 58 (24-115)              | 78 (32-151)                                                         | 95 (41-159)             | 0.003 <sup>^</sup>   |

|                                                     |                   |                    |                   |                   |                   |
|-----------------------------------------------------|-------------------|--------------------|-------------------|-------------------|-------------------|
| Bone marrow blasts (%)                              |                   |                    |                   |                   |                   |
| Median (Interquartile Range)                        | 3 (1-5)           | 2 (0-5)            | 3 (1-7)           | 3 (1-5)           | 0.21 <sup>^</sup> |
| Monosomal karyotype                                 |                   |                    |                   |                   |                   |
| No                                                  | 403 (73)          | 107 (74)           | 202 (74)          | 94 (69)           | 0.67 <sup>†</sup> |
| Yes                                                 | 77 (14)           | 20 (14)            | 36 (13)           | 21 (15)           |                   |
| Unknown                                             | 75 (14)           | 18 (12)            | 36 (13)           | 21 (15)           |                   |
| Prior MDS therapy                                   |                   |                    |                   |                   |                   |
| None                                                | 136 (25)          | 45 (31)            | 64 (23)           | 27 (20)           | 0.06 <sup>†</sup> |
| HMA only                                            | 357 (64)          | 84 (58)            | 179 (65)          | 94 (69)           |                   |
| Chemotherapy                                        | 35 (6)            | 12 (8)             | 15 (5)            | 8 (6)             |                   |
| Missing                                             | 27 (5)            | 4 (3)              | 16 (6)            | 7 (5)             |                   |
| Therapy-related MDS                                 |                   |                    |                   |                   |                   |
| De Novo MDS                                         | 445 (80)          | 108 (74)           | 225 (82)          | 112 (82)          | 0.09 <sup>†</sup> |
| t-MDS                                               | 110 (20)          | 37 (26)            | 49 (18)           | 24 (18)           |                   |
| Time from MDS diagnosis to transplantation (Months) |                   |                    |                   |                   |                   |
| Median (range)                                      | 9.5 (0.4 – 266.0) | 10.6 (0.6 – 266.0) | 8.7 (0.4 – 134.0) | 9.2 (2.6 – 111.3) | 0.27 <sup>^</sup> |
| <b>Transplant-related variables</b>                 |                   |                    |                   |                   |                   |
| Graft type                                          |                   |                    |                   |                   |                   |
| Bone marrow                                         | 51 (9)            | 15 (10)            | 23 (8)            | 13 (10)           | 0.65 <sup>†</sup> |
| PBSC                                                | 472 (85)          | 119 (82)           | 236 (86)          | 117 (86)          |                   |
| Cord Blood                                          | 28 (5)            | 10 (7)             | 13 (5)            | 5 (4)             |                   |
| Other                                               | 4 (1)             | 1 (1)              | 2 (1)             | 1 (1)             |                   |
| Donor group                                         |                   |                    |                   |                   |                   |
| Matched, Related                                    | 61 (11)           | 11 (8)             | 32 (12)           | 18 (13)           | 0.22 <sup>†</sup> |
| Matched, Unrelated                                  | 356 (64)          | 89 (61)            | 180 (66)          | 87 (64)           |                   |
| Mismatched                                          | 106 (19)          | 34 (23)            | 47 (17)           | 25 (18)           |                   |
| Cord Blood                                          | 32 (6)            | 11 (8)             | 15 (5)            | 6 (4)             |                   |
| Donor age                                           |                   |                    |                   |                   |                   |
| <35                                                 | 345 (62)          | 95 (66)            | 164 (60)          | 86 (63)           | 0.73 <sup>†</sup> |
| ≥35                                                 | 206 (37)          | 50 (34)            | 107 (39)          | 49 (36)           |                   |
| Missing                                             | 4 (1)             | -                  | 3 (1)             | 1 (1)             |                   |
| Donor sex                                           |                   |                    |                   |                   |                   |
| Male                                                | 383 (69)          | 101 (70)           | 183 (67)          | 99 (73)           | 0.61 <sup>†</sup> |
| Female                                              | 148 (27)          | 37 (26)            | 80 (29)           | 31 (23)           |                   |
| Missing                                             | 24 (4)            | 7 (5)              | 11 (4)            | 6 (4)             |                   |
| Sex match (Donor/Recipient)                         |                   |                    |                   |                   |                   |
| Male/Male                                           | 252 (45)          | 74 (51)            | 123 (45)          | 55 (40)           | 0.03 <sup>†</sup> |
| Male/Female                                         | 131 (24)          | 27 (19)            | 60 (22)           | 44 (32)           |                   |
| Female/Male                                         | 77 (14)           | 22 (15)            | 41 (15)           | 14 (10)           |                   |
| Female/Female                                       | 71 (13)           | 15 (10)            | 39 (14)           | 17 (12)           |                   |

|                          |          |          |          |          |                   |
|--------------------------|----------|----------|----------|----------|-------------------|
| Missing                  | 24 (4)   | 7 (5)    | 11 (4)   | 6 (4)    |                   |
| in vivo T-cell depletion |          |          |          |          |                   |
| No                       | 289 (52) | 69 (48)  | 148 (54) | 72 (53)  | 0.25 <sup>†</sup> |
| Yes                      | 251 (45) | 73 (50)  | 120 (44) | 58 (43)  |                   |
| Missing                  | 15 (3)   | 3 (2)    | 6 (2)    | 6 (4)    |                   |
| GVHD prophylaxis         |          |          |          |          |                   |
| None reported            | 13 (2)   | 2 (1)    | 5 (2)    | 6 (4)    | 0.61 <sup>†</sup> |
| Ex vivo T-cell depletion | 5 (1)    | 3 (2)    | 1 (0)    | 1 (1)    |                   |
| CD34 selection           | 7 (1)    | 3 (2)    | 2 (1)    | 2 (1)    |                   |
| Cyclophosphamide-based   | 6 (1)    | 2 (1)    | 2 (1)    | 2 (1)    |                   |
| Tacrolimus-based         | 434 (78) | 112 (77) | 219 (80) | 103 (76) |                   |
| CSA-based                | 70 (13)  | 18 (12)  | 34 (12)  | 18 (13)  |                   |
| Other                    | 20 (4)   | 5 (3)    | 11 (4)   | 4 (3)    |                   |
| Year of transplantation  |          |          |          |          |                   |
| ≤2007                    | 80 (14)  | 26 (18)  | 38 (14)  | 16 (12)  | 0.14 <sup>†</sup> |
| >2007                    | 475 (86) | 119 (82) | 236 (86) | 120 (88) |                   |

<sup>†</sup>Kruskal-Wallis trend test, <sup>‡</sup>Jonckheere-Terpstra test, <sup>^</sup>Cuzick's trend test

# Supplemental Figure 1 – Outcomes by telomere length quartiles in patients under age 40

Panel A shows the distribution of telomere lengths and transplant outcomes by age-unadjusted telomere length quartiles in patients under age 40. Panel B shows the strategy for telomere length age-adjustment and transplant outcomes in age-adjusted telomere quartiles in patients under age 40.

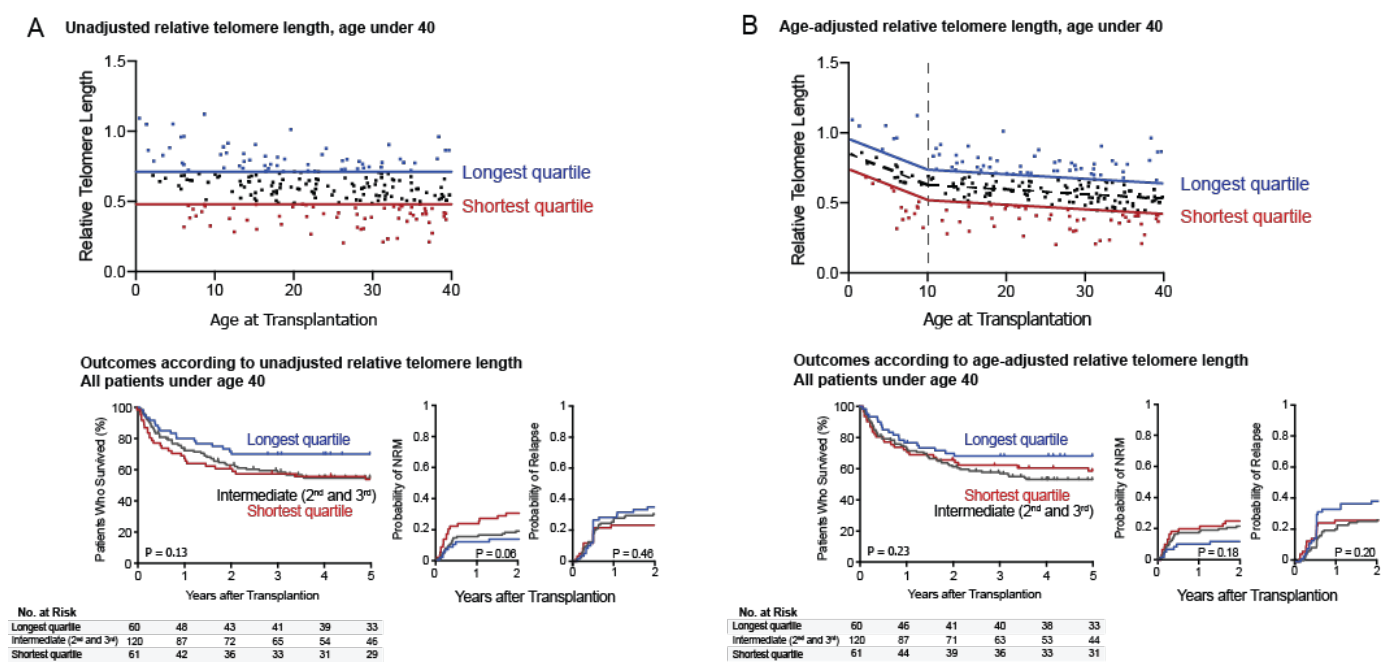

## Supplemental Figure 2 – Characteristics of patients with somatic mutations in *SRSF2*, *DNMT3A*, *STAG2*, *ATM*, *WT1*, and *PPM1D*

Panel A shows the association between variant allele fraction (VAF) and telomere length for genes that were significantly associated with longest or shortest telomere length quartiles in Figure 1D. Also shown is the age at transplantation (Panel B), sex (Panel C), and absolute neutrophil count at transplantation (Panel D) according to mutation status in genes that were associated with longest (blue) and shortest (red) telomere length quartiles in Figure 1D. Nominal P values shown.

### A Association between variant allele fraction (VAF) and relative telomere length

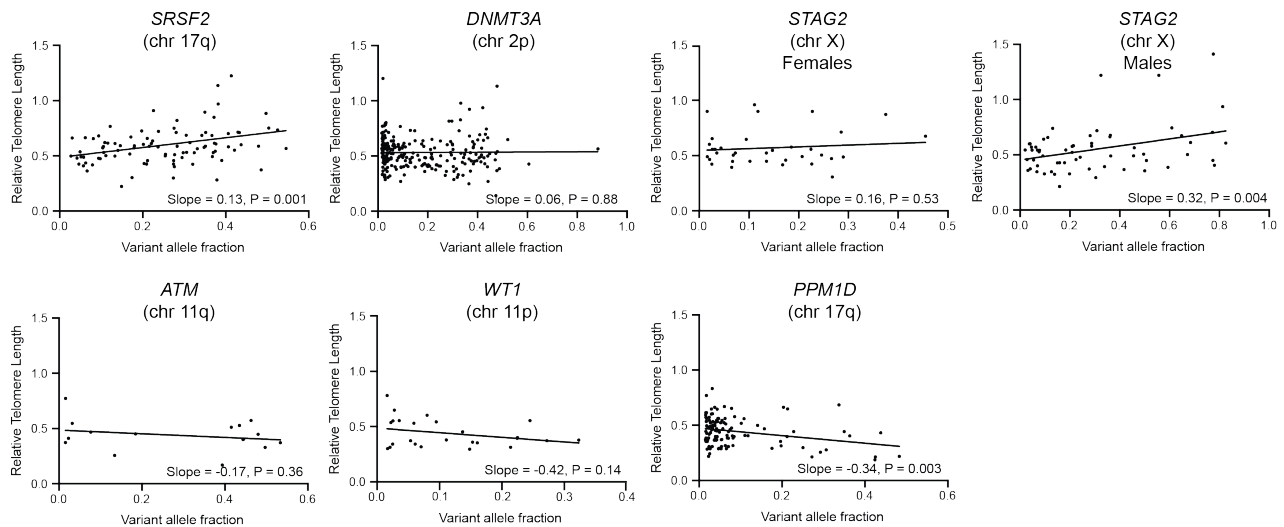

### B Age at transplantation

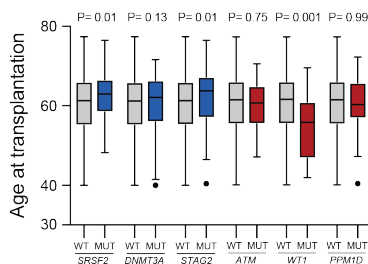

### C Proportion of female patients

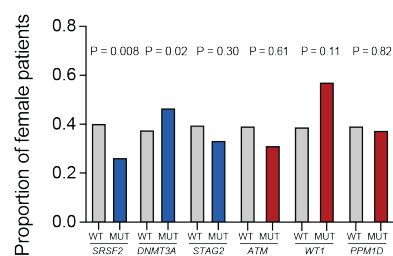

### D Neutrophil count at transplantation

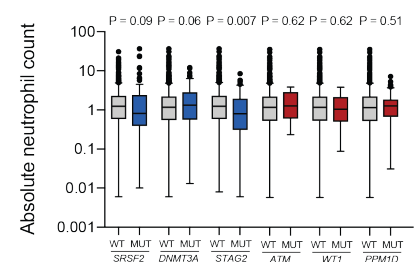

### Supplemental Figure 3 - Association between recipient neutrophil count and recipient telomere length

Shown is the proportion of neutrophils in the white blood cell differential and recipient relative telomere length at transplantation.

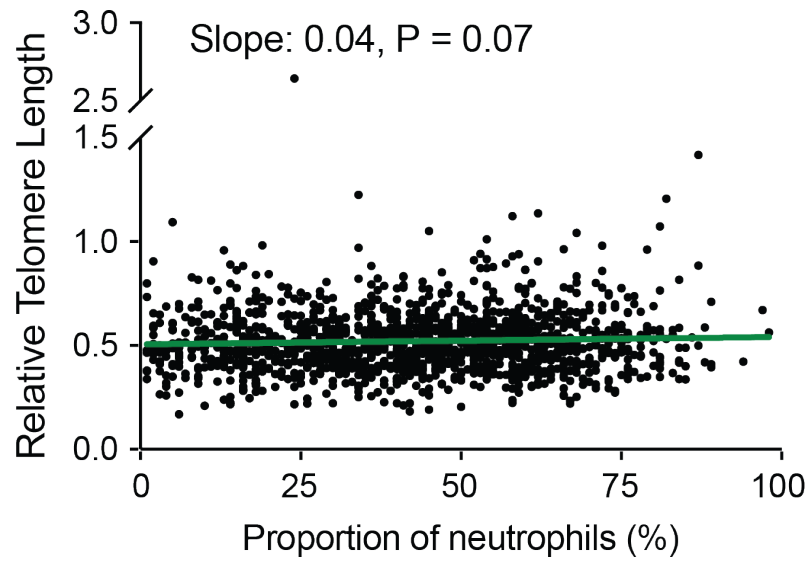

Supplemental Figure 4 –Outcomes in myeloablative and reduced intensity conditioning, pairwise telomere quartile comparisons

**Myeloablative conditioning**

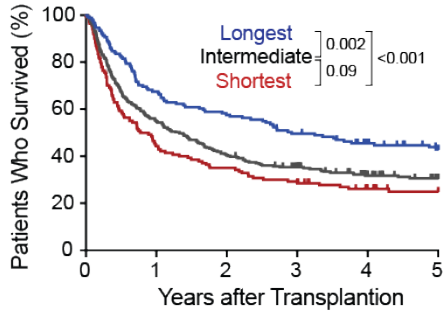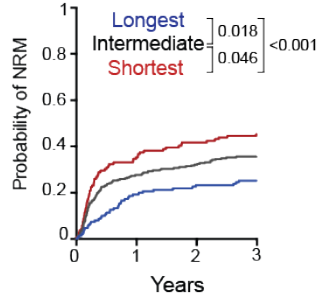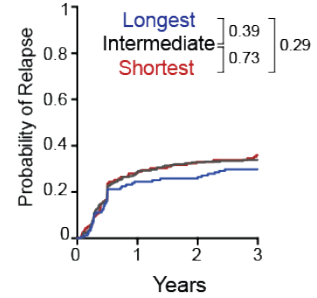

**No. at Risk**

|                                                     |     |     |     |    |    |    |
|-----------------------------------------------------|-----|-----|-----|----|----|----|
| Longest quartile                                    | 151 | 102 | 87  | 74 | 58 | 46 |
| Intermediate (2 <sup>nd</sup> and 3 <sup>rd</sup> ) | 291 | 160 | 118 | 97 | 69 | 49 |
| Shortest quartile                                   | 140 | 62  | 49  | 40 | 27 | 21 |

**Reduced intensity conditioning**

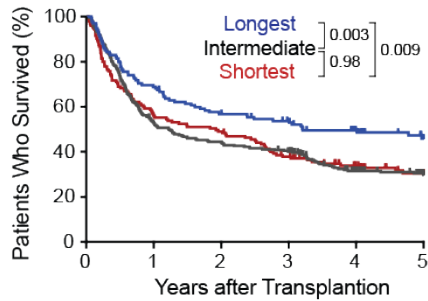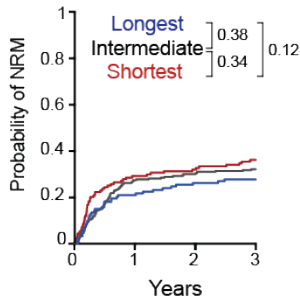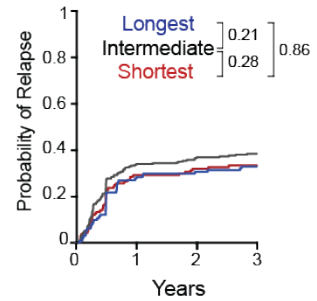

**No. at Risk**

|                                                     |     |     |     |     |    |    |
|-----------------------------------------------------|-----|-----|-----|-----|----|----|
| Longest quartile                                    | 136 | 93  | 74  | 66  | 49 | 31 |
| Intermediate (2 <sup>nd</sup> and 3 <sup>rd</sup> ) | 274 | 143 | 120 | 107 | 65 | 44 |
| Shortest quartile                                   | 145 | 81  | 71  | 53  | 37 | 24 |



### Supplemental Figure 5 – HCT-CI score and year of transplantation

On the left, the number of patients with missing HCT-CI score by year of transplantation. On the right, the number of patients belonging to each HCT-CI score group by year of transplantation. Patients age 40 or older are shown.

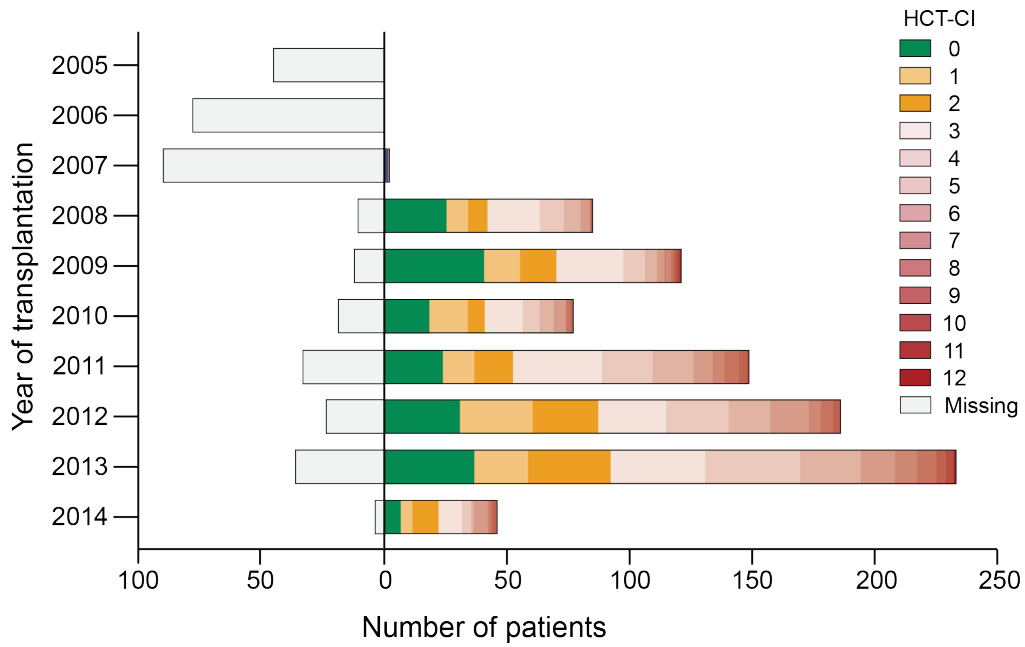

## Supplemental Figure 6 – Outcomes after chronic GVHD by telomere length

Cumulative incidence of chronic GVHD (Panel A), overall survival (Panel B) and cumulative incidence of non-relapse mortality (Panel C) after chronic GVHD onset by telomere length quartiles.

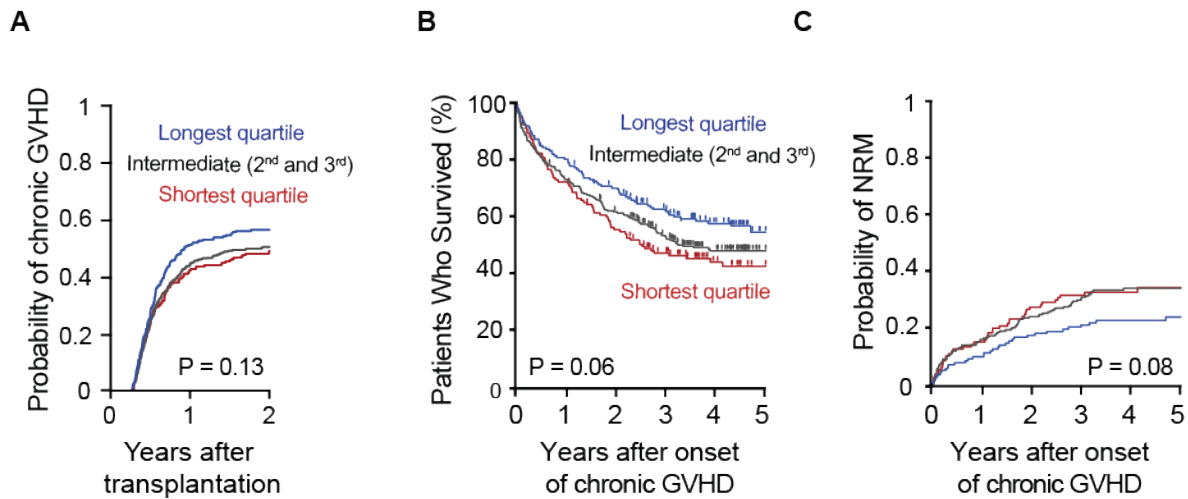

| No. at Risk                                         |     |     |     |     |    |    |
|-----------------------------------------------------|-----|-----|-----|-----|----|----|
| Longest quartile                                    | 171 | 136 | 116 | 95  | 70 | 45 |
| Intermediate (2 <sup>nd</sup> and 3 <sup>rd</sup> ) | 291 | 211 | 174 | 132 | 89 | 57 |
| Shortest quartile                                   | 141 | 101 | 76  | 57  | 33 | 23 |

### Supplemental Figure 7 – Distribution of melphalan doses in Flu/Mel RIC

Melphalan dose was available for 86 patients in the fludarabine/melphalan-based RIC group. Orange line represents the median value.

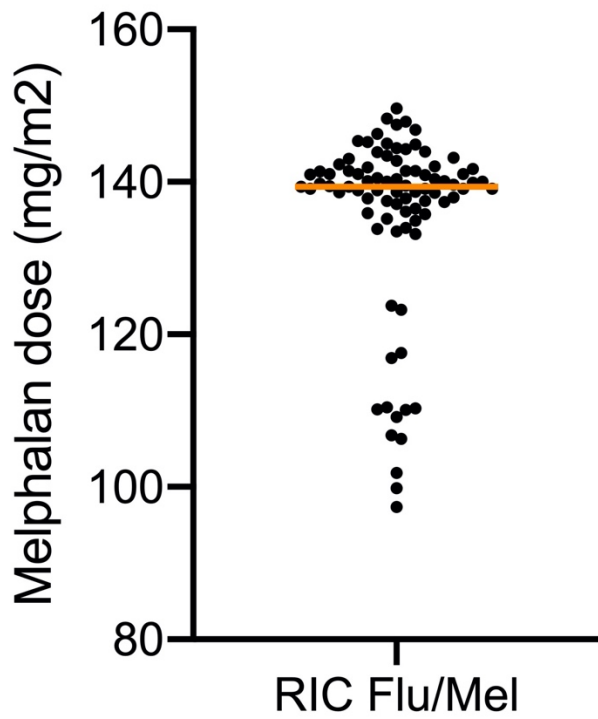

# Supplemental Figure 8 – Outcomes by telomere length quartiles in RIC groups

## A Flu/Mel based RIC

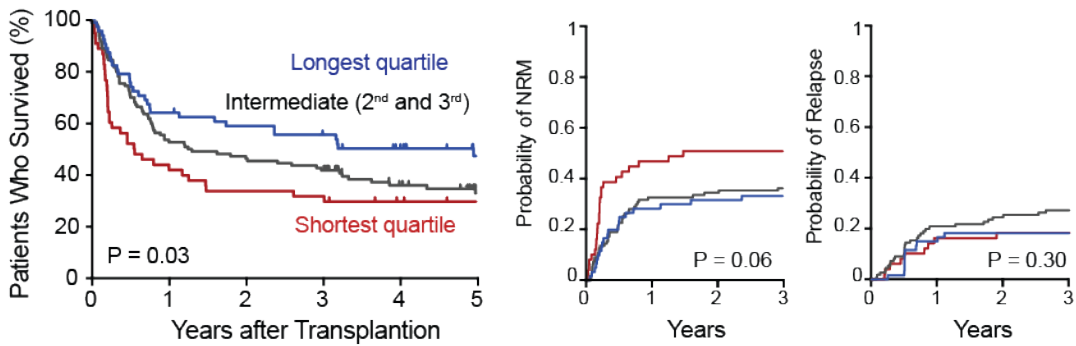

**No. at Risk**

|                                                     |     |    |    |    |    |    |
|-----------------------------------------------------|-----|----|----|----|----|----|
| Longest quartile                                    | 61  | 39 | 35 | 33 | 26 | 17 |
| Intermediate (2 <sup>nd</sup> and 3 <sup>rd</sup> ) | 110 | 60 | 53 | 47 | 31 | 19 |
| Shortest quartile                                   | 49  | 22 | 17 | 16 | 12 | 10 |

## B Non-Flu/Mel based RIC

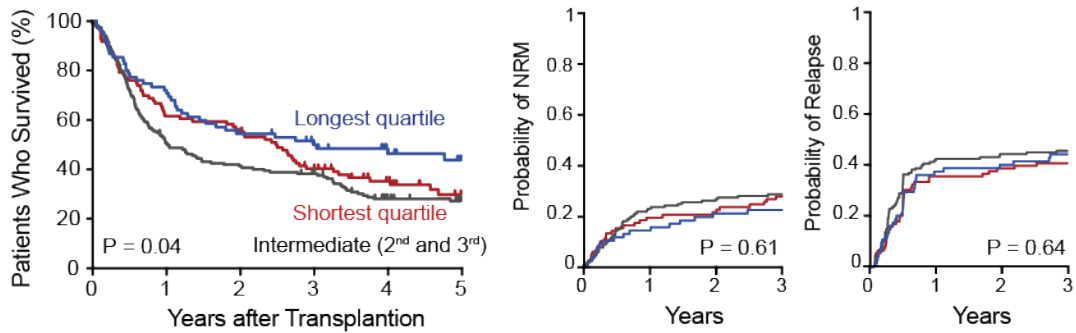

**No. at Risk**

|                                                     |     |    |    |    |    |    |
|-----------------------------------------------------|-----|----|----|----|----|----|
| Longest quartile                                    | 75  | 54 | 39 | 33 | 23 | 14 |
| Intermediate (2 <sup>nd</sup> and 3 <sup>rd</sup> ) | 164 | 83 | 67 | 60 | 34 | 25 |
| Shortest quartile                                   | 96  | 59 | 54 | 37 | 25 | 14 |

## References:

1. Shaffer BC, Ahn KW, Hu Z-H, et al. Scoring System Prognostic of Outcome in Patients Undergoing Allogeneic Hematopoietic Cell Transplantation for Myelodysplastic Syndrome. *J Clin Oncol* 2016;34(16):1864–71.
2. Sorror ML, Maris MB, Storb R, et al. Hematopoietic cell transplantation (HCT)-specific comorbidity index: a new tool for risk assessment before allogeneic HCT. *Blood* 2005;106(8):2912–9.
